# Supplementary figures and images for: Differentially Expressed Circular RNA Profile in an Intracranial Aneurysm Group Compared with a Healthy Control Group
Source: Hindawi journal article supplement (doi:10.1155/2021/8889569), 2021-01-29

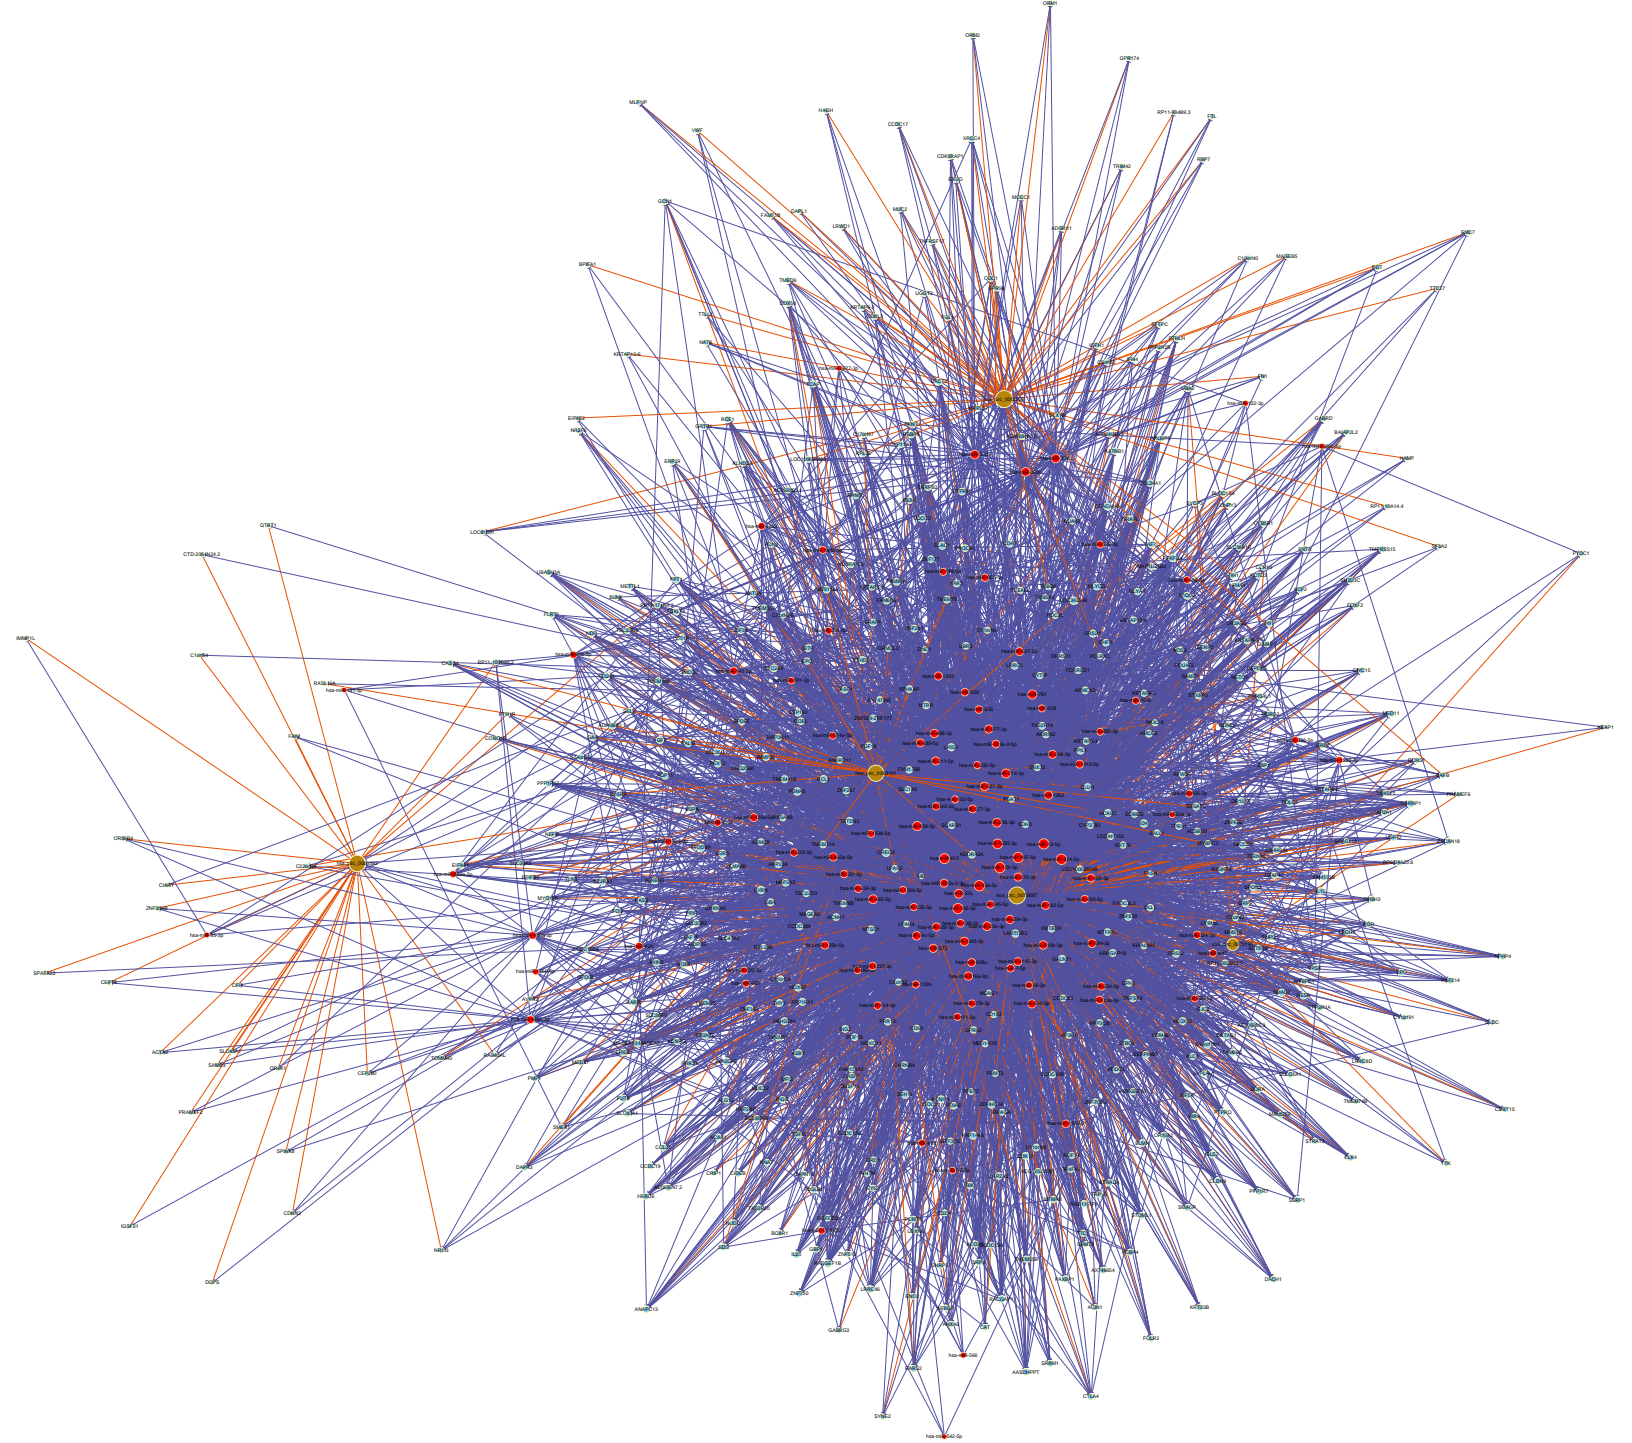

Supplement: f1 [file 8889569.f1.zip]
